# Supplementary material
Source: Springer Nature journal article supplement (https://www.springermedizin.de/resource/supplementary/12874_2013_1162_MOESM1_ESM.pdf/9433444)
Supplement: MOESM1 [file 9433444]

## Mathematical Supplement

### Functional clustering

In order to identify subgroups an exploratory functional clustering for sparse data was applied. The clustering model by James et al [1] assumes that the observed values  $y_i$  for individuals  $i$  can be constructed from a function  $g_i$  subject to measurement errors  $\varepsilon_i$  at measurements of %Wmax,  $x_{i1}, \dots, x_{in_i}$ .

$$Y_i = g_i + \varepsilon_i, \quad i = 1, \dots, n$$

The measurement errors have mean zero and are uncorrelated. It is assumed that unobserved  $x$  are missing at random. Spline basis functions are used for the functions  $g$ . This leads to a functional clustering model [1]

$$\begin{aligned} Y_i &= S_i(\lambda_0 + \Lambda\alpha_{z_i} + \gamma_i) + \varepsilon_i, \quad i = 1, \dots, n \\ \varepsilon_i &\sim \mathcal{N}(0, \sigma^2 I), \gamma_i \sim \mathcal{N}(0, \Gamma) \end{aligned}$$

where  $S_i = (s(x_{i1}), \dots, s(x_{in_i}))$  is the spline basis matrix for the  $i$ -th individual. The model  $\lambda_0 + \Lambda\alpha_{z_i}$  parameterizes the cluster means where  $z_i$  refers to the unknown cluster membership.

### Nonlinear mixed effects models

For each child from  $i = 1$  to  $n = 79$ , each with  $n_i$  observations we consider the Mixed-effects Quadratic-Delay model (MQD)

$$y_{ij} = a + b_1 (x_{ij} - c \vee 0) + b_2 (x_{ij} - c \vee 0)^2 + u_i + \epsilon_{ij}, \quad a, b_1, b_2 \in \mathbb{R}, c \in [\min_{i,j}(x_{ij}), \max_{i,j}(x_{ij})]$$

where  $a \vee b$  denotes  $\max\{a, b\}$ . We assume  $\epsilon \sim_{ind} \mathcal{N}(0, \sigma^2)$  with  $\sigma^2$  measures the overall variation, and the random effect  $u_i \sim_{ind} \mathcal{N}(0, \tau^2)$  with  $\tau^2$  measures the variation corresponding to each individual. Let  $Y_i = (y_{i1}, y_{i2}, \dots, y_{in_i})'$  with  $n_i$  observations for the  $i$ th subject and let  $\mathbf{Y} = (Y_1', Y_2', \dots, Y_n')'$ . By stacking all  $N = \sum_i n_i$  observations, the model can be written as:

$$\mathbf{Y} = \mathbf{X}(c)\boldsymbol{\beta} + \mathbf{Z}\mathbf{u} + \boldsymbol{\epsilon}$$

where  $\mathbf{X}(c)$  is the design matrix with each row  $(1, x_{ij} - c \vee 0, (x_{ij} - c \vee 0)^2)$ , and  $\boldsymbol{\beta} = (a, b_1, b_2)'$ . The parameters to be estimated are  $\boldsymbol{\theta} = \{a, b_1, b_2, c, \sigma^2, \tau^2\}$ . A Bayesian approach is used by choosing conjugate priors for the slope  $\boldsymbol{\beta} = (a, b_1, b_2)'$  and the variation components  $\sigma^2, \tau^2$ , and a flat prior for the delay  $c$  over its finite support. Specifically,

$$\begin{aligned}\pi(\boldsymbol{\beta}) &= \mathcal{N}_3(\mathbf{0}_3, \delta^2 I_3) \\ \pi(\sigma^2) &= \text{IG}(a_\sigma, b_\sigma) \\ \pi(\tau^2) &= \text{IG}(a_\tau, b_\tau) \\ \pi(c) &= \text{Uniform}(\min_{i,j}(x_{ij}), \max_{i,j}(x_{ij}))\end{aligned}$$

where  $\mathcal{N}_p(\mu, \Sigma)$  denotes a  $p$ -dimensional Gaussian distribution with mean  $\mu$  and covariance  $\Sigma$ , and  $\text{IG}(a, b)$  denotes Inverse Gamma distribution with shape parameter  $a$  and scale parameter  $b$ . In practice, we choose the hyper-parameters  $\delta^2 = 10^3$ ,  $a_\sigma = a_\tau = 2$  and  $b_\sigma = b_\tau = 0.01$  which yields a dispersed prior density for less subjectivity. The full conditional distributions for Gibbs sampler are:

$$\begin{aligned}\pi(\boldsymbol{\beta} | \dots) &= \mathcal{N}_3(\mu_{\boldsymbol{\beta}}, \Sigma_{\boldsymbol{\beta}}) \begin{cases} \Sigma_{\boldsymbol{\beta}} = (\sigma^{-2} \mathbf{X}(c)' \mathbf{X}(c) + \delta^{-2} I_3)^{-1} \\ \mu_{\boldsymbol{\beta}} = \sigma^{-2} \Sigma_{\boldsymbol{\beta}} \mathbf{X}(c)' \mathbf{Y} \end{cases} \\ \pi(\sigma^2 | \dots) &= \text{IG}(N/2 + a_\sigma, \boldsymbol{\epsilon}' \boldsymbol{\epsilon} / 2 + b_\sigma), \quad \text{where } \boldsymbol{\epsilon} = \mathbf{Y} - \mathbf{X}(c)\boldsymbol{\beta} - \mathbf{u} \\ \pi(\tau^2 | \dots) &= \text{IG}(n/2 + a_\tau, \mathbf{u}' \mathbf{u} / 2 + b_\tau) \\ \pi(c | \dots) &\propto \exp\left\{-\frac{1}{2\sigma^2} \sum_{i,j} (\Delta_{ij} - u_i)^2\right\} \\ \pi(u_i | \dots) &= \mathcal{N}_1\left(\frac{\tau^2}{n_i \tau^2 + \sigma^2} \sum_{j=1}^{n_i} \Delta_{ij}, \frac{\tau^2}{n_i \tau^2 + \sigma^2}\right)\end{aligned}$$

where  $\Delta_{ij} = y_{ij} - a - b_1(x_{ij} - c \vee 0) - b_2(x_{ij} - c \vee 0)^2$ . Note  $\pi(c | \dots)$  is not in closed form and can be computed numerically using Griddy-Gibbs sampler [2] over its finite support  $[\min_{i,j}(x_{ij}), \max_{i,j}(x_{ij})]$ . For instance,  $\min_{i,j} x_{ij}$  is 0.08 for %maximum work capacity. An estimated delay  $c$  that is close to its lower limit indicates a negligible delay effect. This can happen due to pooled data masking delay effects for individuals.

Therefore we extend the mixed-effects quadratic-delay model to allow varying delay effects, by incorporating another random effect  $\gamma_i$  for the delay parameter  $c$ :

$$\begin{aligned} y_{ij} &= a + b_1(x_{ij} - c_i \vee 0) + b_2(x_{ij} - c_i \vee 0)^2 + u_i + \epsilon_{ij}, \quad a, b_1, b_2 \in \mathbb{R} \\ c_i &= c + \gamma_i, \quad c_i \in [\min_j(x_{ij}), \max_j(x_{ij})] \end{aligned}$$

with the constraint  $\sum_i \gamma_i = 0$  to avoid identifiability issues. Again we assume  $\epsilon \sim \mathcal{N}(0, \sigma^2)$  with  $\sigma^2$  measures the overall variation, the random intercept  $u_i \sim \mathcal{N}(0, \tau^2)$  and random delay  $\gamma_i \sim \mathcal{N}(0, \nu^2)$  with  $\tau^2$  and  $\nu^2$  measure the variation of due to each individual. All three components are assumed to be independent. This Mixed-effects Quadratic-Delay Model with Varying delays (MQDV) can be written in matrix format

$$\mathbf{Y} = \mathbf{X}(c, \boldsymbol{\gamma})\boldsymbol{\beta} + \mathbf{Z}\mathbf{u} + \boldsymbol{\epsilon}$$

with parameters  $\boldsymbol{\theta} = \{a, b_1, b_2, c, \sigma^2, \tau^2, \nu^2\}$ . We further assume  $\pi(\nu^2) = \text{IG}(a_\nu, b_\nu)$ . The conditional distributions for Gibbs sampler are the same for  $\{a, b_1, b_2, c, \sigma^2, \tau^2\}$  except that  $\mathbf{X}(c)$  is replaced by  $\mathbf{X}(c, \boldsymbol{\gamma})$ , i.e.,  $x_{ij} - c \vee 0$  replaced by  $x_{ij} - c_i \vee 0$ , and for updating  $c$  the support  $[\min_{i,j}(x_{ij}), \max_{i,j}(x_{ij})]$  is replaced by

$$[\max_i(\min_j(x_{ij}) - \gamma_i), \min_i(\max_j(x_{ij}) - \gamma_i)]$$

and we have

$$\begin{aligned} \pi(\nu^2 | \dots) &= \text{IG}(n/2 + a_\nu, \boldsymbol{\gamma}'\boldsymbol{\gamma}/2 + b_\nu) \\ \pi(\boldsymbol{\gamma}_i | \dots) &\propto \exp\left\{-\frac{1}{2\sigma^2} \sum_{j=1}^{n_i} (\Delta_{ij} - u_i)^2 - \frac{1}{2\nu^2} \gamma_i^2\right\} \end{aligned}$$

where  $\Delta_{ij} = y_{ij} - a - b_1(x_{ij} - c - \gamma_i \vee 0) - b_2(x_{ij} - c - \gamma_i \vee 0)^2$ . Again the posterior distribution for  $\gamma_i$  is not a known distribution but can be sampled numerically using Griddy-Gibbs sampler over its support  $[\min_j(x_{ij}) - c, \max_j(x_{ij}) + c]$ . With the constraint  $\sum_i \gamma_i = 0$  we update  $\gamma_i$  for  $i = 1, 2, \dots, n-1$  and let  $\gamma_n = -\sum_{i=1}^{n-1} \gamma_i$ .

The Mixed-effects Power-Delay Model (MPD) is given by

$$y_{ij} = a + b_2(x_{ij} - c \vee 0)^d + u_i + \epsilon_{ij}, \quad a, b_2, d \in \mathbb{R}, c \in [\min_{i,j}(x_{ij}), \max_{i,j}(x_{ij})]$$

and the Mixed-effects Power-Delay Model with Varying delays (MPDV)

$$\begin{aligned} y_{ij} &= a + b_2(x_{ij} - c_i \vee 0)^d + u_i + \epsilon_{ij}, \quad a, b_2, d \in \mathbb{R} \\ c_i &= c + \gamma_i, \quad c_i \in [\min_j(x_{ij}), \max_j(x_{ij})] \end{aligned}$$

Compared to the quadratic models,  $\beta = (a, b_1, b_2)'$  is replaced by  $\beta = (a, b_2, d)'$  with exponent  $d$ . The conditional distributions for common parameters are the same, except  $\mathbf{X}(c)$  is replaced by  $\mathbf{X}(c, d)$ , i.e., each row  $(1, x_{ij} - c \vee 0, (x_{ij} - c \vee 0)^2)$  is replaced by  $(1, (x_{ij} - c \vee 0)^d)$  for MPD, and similarly  $\mathbf{X}(c, \gamma)$  is replaced by  $\mathbf{X}(c, d, \gamma)$  for MPDV. For power parameter  $d$ , we choose uniform prior over a specified appropriate support that is suggested by the data. Specifically, we choose  $\pi(d) = \text{Uniform}(0, 20)$ . Similarly the conditional posterior distribution for  $c$  is not known and can be computed numerically over the specified range.

## References

- [1] James GM, Sugar CA: **Clustering for sparsely sampled functional data.** *J Am Stat Assoc* 2003, **98**:397–408.
- [2] Ritter C, Tanner MA: **Facilitating the Gibbs sampler: the Gibbs stopper and the Griddy-Gibbs sampler.** *J Am Stat Assoc* 1992, **87**:861–868.
